# Supplementary material for: Downstream Antisense Transcription Predicts Genomic Features That Define the Specific Chromatin Environment at Mammalian Promoters
Source: PubMed Central journal article supplement (PMC4972320; doi:10.1371/journal.pgen.1006224), 2016-08-03
Supplement: pgen.1006224.s001.pdf [file pgen.1006224.s001.pdf]

**S1 Table. Sources of public data.**

| Experimental data type | Cell line  | GEO/SRA ID(s)                            | Reference |
|------------------------|------------|------------------------------------------|-----------|
| Pol II ChIP-seq        | MCF7       | GSM822295                                | [1]       |
| H2A.Z ChIP-seq         | HMEC       | GSM1003500                               | [1]       |
| H3K4me3 ChIP-seq       | HMEC       | GSM733712                                | [1]       |
| H3K27ac ChIP-seq       | HMEC       | GSM733660                                | [1]       |
| H3K4me1 ChIP-seq       | HMEC       | GSM733705                                | [1]       |
| HeK36me3 ChIP-seq      | HMEC       | GSM733707                                | [1]       |
| TBP ChIP-seq           | GM12878    | GSM935277                                | [1]       |
| GATA3 ChIP-seq         | MCF7       | GSM1010783                               | [1]       |
| SP1 ChIP-seq           | A549       | GSM1010813                               | [1]       |
| NFIC ChIP-seq          | GM12878    | GSM1010881                               | [1]       |
| c-Fos ChIP-seq         | K562       | GSM935355                                | [1]       |
| c-Jun ChIP-seq         | K562       | GSM935411                                | [1]       |
| p300 ChIP-seq          | MCF7       | GSM1010800                               | [1]       |
| CHD1-A ChIP-seq        | K562       | GSM1003575                               | [1]       |
| Sap30 ChIP-seq         | K562       | GSM1003445                               | [1]       |
| BRG1 ChIP-seq          | HeLa       | GSM935511                                | [1]       |
| INI1 ChIP-seq          | HeLa       | GSM935634                                | [1]       |
| BAF155 ChIP-seq        | HeLa       | GSM935637                                | [1]       |
| BAF170 ChIP-seq        | HeLa       | GSM935638                                | [1]       |
| CTCF ChIP-seq          | A549       | GSM1003606                               | [1]       |
| FAIRE-seq              | T-47D/A1-2 | SRA044977                                | [2]       |
| MNase-seq              | MCF7       | GSM1856003,<br>GSM1856004,<br>GSM1856005 | [3]       |
| Pol II ChIP-seq        | GM12878    | GSM935386                                | [1]       |
| Pol II ChIP-seq        | K562       | GSM935358                                | [1]       |
| NET-seq                | HeLa       | GSM1505438,<br>GSM1505439                | [4]       |
| NET-seq                | HEK293T    | GSM1505440,<br>GSM1505441                | [4]       |
| GRO-seq                | GM12878    | GSM1480326                               | [5]       |
| GRO-seq                | K562       | GSM1480325                               | [5]       |
| GRO-cap                | GM12878    | GSM1480323                               | [5]       |
| GRO-cap                | K562       | GSM1480321                               | [5]       |
| PRO-seq                | K562       | GSM1480327                               | [5]       |
| SPT5 ChIP-seq          | HeLa       | GSM1280295                               | [6]       |
| NELF-A ChIP-seq        | HeLa       | GSM1280296                               | [6]       |
| NELF-E ChIP-seq        | K562       | GSM935392                                | [1]       |
| Ccnt2 ChIP-seq         | K562       | GSM935547                                | [1]       |

1. Encode Project Consortium (2012) An integrated encyclopedia of DNA elements in the human genome. *Nature* 489: 57-74.
2. Burd CJ, Ward JM, Crusselle-Davis VJ, Kissling GE, Phadke D, et al. (2012) Analysis of chromatin dynamics during glucocorticoid receptor activation. *Mol Cell Biol* 32: 1805-1817.
3. Takaku M, Grimm SA, Shimbo T, Perera L, Menafra R, et al. (2016) GATA3-dependent cellular reprogramming requires activation-domain dependent recruitment of a chromatin remodeler. *Genome Biol* 17: 36.
4. Mayer A, di Iulio J, Maleri S, Eser U, Vierstra J, et al. (2015) Native elongating transcript sequencing reveals human transcriptional activity at nucleotide resolution. *Cell* 161: 541-554.
5. Core LJ, Martins AL, Danko CG, Waters CT, Siepel A, et al. (2014) Analysis of nascent RNA identifies a unified architecture of initiation regions at mammalian promoters and enhancers. *Nat Genet* 46: 1311-1320.

6. Liu P, Xiang Y, Fujinaga K, Bartholomeeusen K, Nilson KA, et al. (2014) Release of positive transcription elongation factor b (P-TEFb) from 7SK small nuclear ribonucleoprotein (snRNP) activates hexamethylene bisacetamide-inducible protein (HEXIM1) transcription. *J Biol Chem* 289: 9918-9925.
