# Supplementary material for: Downstream Antisense Transcription Predicts Genomic Features That Define the Specific Chromatin Environment at Mammalian Promoters
Source: PubMed Central journal article supplement (PMC4972320; doi:10.1371/journal.pgen.1006224), 2016-08-03
Supplement: pgen.1006224.s002.pdf [file pgen.1006224.s002.pdf]

**S2 Table. Enrichment test p-values for ChIP-seq data sets.**

| ChIP-seq experiment | p-value (Two-tailed Wilcoxon) | Reference |
|---------------------|-------------------------------|-----------|
| SPT5                | $2.65 \times 10^{-33}$        | [1]       |
| NELF-A              | $1.25 \times 10^{-37}$        | [1]       |
| NELF-E              | $1.17 \times 10^{-32}$        | [2]       |
| Ccnt2               | $2.27 \times 10^{-63}$        | [2]       |
| H2A.Z               | $6.60 \times 10^{-10}$        | [2]       |
| H3K27ac             | $1.17 \times 10^{-3}$         | [2]       |
| H3K4me3             | $3.95 \times 10^{-2}$         | [2]       |
| H3K9ac              | 0.978                         | [2]       |
| H3K4me1             | 0.530                         | [2]       |
| HeK36me3            | 0.442                         | [2]       |
| TBP                 | $6.04 \times 10^{-27}$        | [2]       |
| GATA3               | $2.07 \times 10^{-116}$       | [2]       |
| SP1                 | $4.91 \times 10^{-47}$        | [2]       |
| NFIC                | $1.67 \times 10^{-17}$        | [2]       |
| c-Fos               | $1.22 \times 10^{-18}$        | [2]       |
| c-Jun               | $3.57 \times 10^{-52}$        | [2]       |
| p300                | $8.32 \times 10^{-81}$        | [2]       |
| CHD1-A              | $6.51 \times 10^{-09}$        | [2]       |
| Sap30               | $7.58 \times 10^{-16}$        | [2]       |
| BRG1                | $5.43 \times 10^{-14}$        | [2]       |
| INI1                | $3.32 \times 10^{-68}$        | [2]       |
| BAF155              | $7.60 \times 10^{-28}$        | [2]       |
| BAF170              | $1.98 \times 10^{-18}$        | [2]       |
| CTCF                | $2.85 \times 10^{-26}$        | [2]       |

1. Liu P, Xiang Y, Fujinaga K, Bartholomeeusen K, Nilson KA, et al. (2014) Release of positive transcription elongation factor b (P-TEFb) from 7SK small nuclear ribonucleoprotein (snRNP) activates hexamethylene bisacetamide-inducible protein (HEXIM1) transcription. *J Biol Chem* 289: 9918-9925.
2. Encode Project Consortium (2012) An integrated encyclopedia of DNA elements in the human genome. *Nature* 489: 57-74.
